# Supplementary material for: Molecular Epidemiology of Chronic Pseudomonas aeruginosa Airway Infections in Cystic Fibrosis
Source: PLoS One. 2012 Nov 28;7(11):e50731. doi: 10.1371/journal.pone.0050731 (PMC3508996; doi:10.1371/journal.pone.0050731)
Supplement: Table S3 — Characteristics of study participants. (XLS) [file pone.0050731.s003.xls]

## Sheet: Tabelle1
Table S3: Characteristics of study participants
Patient	Month of birth	gender	CFTR mutation genotype	age at acquisition of PA [years]
K1	11/1969	m	F508del/F508del	8
K2	11/1960	f	F508del/F508del	10
K3	02/1969	m	F508del/F508del	8
K4	08/1970	f	F508del/F508del	6
K5	11/1964	m	F508del/F508del	7
K6	08/1966	f	F508del/3129del4	6
K7	01/1967	f	F508del/712-1G-T	11
K8	10/1966	f	F508del/F508del	12
K9	05/1967	m	F508del/F508del	12
K10	07/1968	f	F508del/F508del	12
K11	06/1968	m	F508del/T388X	11
K12	02/1964	m	F508del/F508del	6
H1	02/1981	m	F508del/F508del	4
H2	03/1978	m	F508del/G542X	7
H3	02/1975	f	F508del/N1303K	17
H4	02/1977	f	F508del/F508del	8
H5	07/1972	m	F508del/F508del	14
H6	01/1987	f	CFTR dele2,3(21kb)/1078delT	4
H7	09/1977	f	F508del/F508del	7
H8	12/1968	f	F508del/R347P	17
H9	04/1979	m	F508del/F508del	5
H10	06/1966	f	F508del/F508del	19
H11	11/1968	m	F508del/F508del	17
H12	05/1974	m	F508del/F508del	11
H13	03/1977	f	F508del/G551D	13
H14	02/1973	m	F508del/R553X	13
H15	01/1971	f	N1303K/3659delC	14
H16	11/1982	f	F508del/F508del	10
H17	05/1975	f	F508del/CFTR dele2,3(21kb)	10
H18	04/1978	f	CFTR dele2,3(21kb)/CFTR dele2,3(21kb)	7
H19	06/1975	f	F508del/F508del	10
H20	03/1981	m	F508del/F508del	4
H21	05/1978	m	F508del/N1303K	8
H22	12/1975	f	F508del/F508del	11
H23	11/1977	f	F508del/R1162X	8
H24	12/1975	m	F508del/2143delT	18
H25	08/1973	f	F508del/F508del	13
H26	07/1968	m	F508del/F508del	17
H27	11/1980	f	F508del/F508del	10
H28	04/1970	f	F508del/F508del	16
H29	12/1977	m	F508del/F508del	8
H30	09/1980	m	F508del/4374+1 G-T	10
H31	04/1975	m	F508del/F508del	5
H32	08/1973	f	F508del/F508del	14
H33	06/1964	m	F508del/2184delA	26
H34	11/1977	m	F508del/F508del	10
H35	10/1975	m	F508del/F508del	15
